# Supplementary material for: Identification and Functional Characterization of Tyrosine Decarboxylase from Rehmannia glutinosa
Source: MDPI journal article supplement (doi:10.3390/molecules27051634), 2022-03-01
Supplement: s1 [file s1]

Table S2. Primers used in this study

| Number of the primers | Names of primers | Sequences of the primers (5'-3') | Descriptions                                  |
|-----------------------|------------------|----------------------------------|-----------------------------------------------|
| Primer 1              | RgTyDC2-FP       | ATGGGCAGCCTTCAGAATCA             | For amplifying RgTyDC2                        |
| Primer 2              | RgTyDC2-RP       | TCACGAACTGGTTAGCAGAGCA           | For amplifying RgTyDC2                        |
| Primer 3              | TIP41-RT-FP      | ATGCGGCTGGAAGCAGGAAG             | For amplifying TIP41 transcripts in QRT-PCR   |
| Primer 4              | TIP41-RT-RP      | GCCAACGCGACCATATCAA              | For amplifying TIP41 transcripts in QRT-PCR   |
| Primer 5              | RgTyDC2-RT-FP    | ATCAGACCCATTCCGCATTA             | For amplifying RgTyDC2 transcripts in QRT-PCR |
| Primer 6              | RgTyDC2-RT-RP    | CGCAGAGGAACAGAGGCAC              | For amplifying RgTyDC2 transcripts in QRT-PCR |
